# Supplementary material
Source: PubMed Central journal article supplement (PMC4453876)
Supplement: NIHMS693260-supplement-Appendix_A.pdf [file NIHMS693260-supplement-Appendix_A.pdf]

**Supplemental Table 1: ICD-9 codes used to identify deep vein thrombosis and pulmonary embolism**

| <b>ICD-9 Code</b>                            | <b>Description</b>                                                                    |
|----------------------------------------------|---------------------------------------------------------------------------------------|
| <i>Deep Vein Thrombosis – acute events</i>   |                                                                                       |
| 451.1                                        | Phlebitis and thrombophlebitis of deep veins of lower extremities                     |
| 451.11                                       | Deep vein thrombosis, femoral                                                         |
| 451.19                                       | Deep vein thrombosis, other leg veins                                                 |
| 451.2                                        | Phlebitis and thrombophlebitis of lower extremities, unspecified                      |
| 451.81                                       | Phlebitis and thrombophlebitis of iliac vein                                          |
| 451.83                                       | Phlebitis and thrombophlebitis of deep veins of upper extremities                     |
| 451.84                                       | Phlebitis and thrombophlebitis of upper extremities, unspecified                      |
| 451.89                                       | Phlebitis and thrombophlebitis of other sites                                         |
| 451.9                                        | Phlebitis and thrombophlebitis of unspecified site                                    |
| 453.2                                        | Embolism and thrombosis of inferior vena cava                                         |
| 453.4                                        | Acute venous embolism and thrombosis of deep vessels of lower extremity               |
| 453.40                                       | Acute venous embolism and thrombosis of unspecified deep vessels of lower extremity.  |
| 453.41                                       | Acute venous embolism and thrombosis of deep vessels of proximal lower extremity.     |
| 453.42                                       | Acute venous embolism and thrombosis of deep vessels of distal lower extremity.       |
| 453.8                                        | Acute venous embolism and thrombosis of other specified veins                         |
| 453.82                                       | Acute venous embolism and thrombosis of deep veins of upper extremity                 |
| 453.83                                       | Acute venous embolism and thrombosis of upper extremity, unspecified                  |
| 453.84                                       | Acute venous embolism and thrombosis of axillary veins                                |
| 453.85                                       | Acute venous embolism and thrombosis of subclavian veins                              |
| 453.86                                       | Acute venous embolism and thrombosis of internal jugular veins                        |
| 453.87                                       | Acute venous embolism and thrombosis of other thoracic veins                          |
| 453.89                                       | Acute venous embolism and thrombosis of other specified veins                         |
| 453.9                                        | Other venous embolism and thrombosis of unspecified site                              |
| <i>Pulmonary Embolism – acute events</i>     |                                                                                       |
| 415.11                                       | Iatrogenic pulmonary embolism and infarction                                          |
| 415.13                                       | Saddle embolus of pulmonary artery                                                    |
| 415.19                                       | Other pulmonary embolism and infarction                                               |
| <i>Deep Vein Thrombosis – chronic events</i> |                                                                                       |
| 453.5                                        | Chronic venous embolism and thrombosis of deep vessels of lower extremity             |
| 453.50                                       | Chronic venous embolism and thrombosis of unspecified deep vessels of lower extremity |
| 453.51                                       | Chronic venous embolism and thrombosis of deep vessels of proximal lower extremity.   |
| 453.52                                       | Chronic venous embolism and thrombosis of deep vessels of distal lower extremity.     |
| 453.7                                        | Chronic venous embolism and thrombosis of other specified vessels                     |
| 453.72                                       | Chronic venous embolism and thrombosis of deep veins of upper extremity               |
| 453.73                                       | Chronic venous embolism and thrombosis of upper extremity, unspecified                |

|                                            |                                                                  |
|--------------------------------------------|------------------------------------------------------------------|
| 453.74                                     | Chronic venous embolism and thrombosis auxiliary veins           |
| 453.75                                     | Chronic venous embolism and thrombosis of subclavian veins       |
| 453.76                                     | Chronic venous embolism and thrombosis of internal jugular veins |
| 453.77                                     | Chronic venous embolism and thrombosis of other thoracic veins   |
| 453.79                                     | Chronic venous embolism and thrombosis of other specified veins  |
| <i>Pulmonary embolism – chronic events</i> |                                                                  |
| 416.2                                      | Chronic pulmonary embolism and infarction                        |

Note: Patients were excluded from our cohort if they had ICD-9 codes listed in this table for either acute or chronic DVT or PE in the 365 days prior to admission or prior to surgery. ICD-9 codes for acute events listed in this table were used to identify post-operative DVT or PE events.

**Supplemental Table 2: ICD-9 procedure codes for orthopedic and abdominal-pelvic surgery**

| <b>ICD-9 Code</b>               | <b>Description</b>                                                         |
|---------------------------------|----------------------------------------------------------------------------|
| <i>Major Orthopedic Surgery</i> |                                                                            |
| 81.40                           | Repair of hip, not elsewhere classified                                    |
| 81.51                           | Total hip replacement                                                      |
| 81.52                           | Partial hip replacement                                                    |
| 81.53                           | Revision of hip replacement, not otherwise specified                       |
| 81.42                           | Five-in-one repair of knee                                                 |
| 81.43                           | Triad knee repair                                                          |
| 81.44                           | Patellar stabilization                                                     |
| 81.45                           | Other repair of the cruciate ligaments                                     |
| 81.46                           | Other repair of the collateral ligaments                                   |
| 81.47                           | Other repair of the knee                                                   |
| 81.54                           | Total knee replacement                                                     |
| 81.55                           | Revision of knee replacement, not otherwise specified                      |
| 79.15                           | Closed reduction of fracture with internal fixation, femur                 |
| 79.35                           | Open reduction of fracture with internal fixation, femur                   |
| 820                             | Fracture of neck of femur                                                  |
| <i>Abdominal/Pelvic Surgery</i> |                                                                            |
| 41.2                            | Splenotomy                                                                 |
| 41.5                            | Total splenectomy                                                          |
| 43.0                            | Gastrotomy                                                                 |
| 43.3                            | Pyloromyotomy                                                              |
| 43.5                            | Partial gastrectomy w/ anastomosis to esophagus                            |
| 43.6                            | Partial gastrectomy w/ anastomosis to duodenum                             |
| 43.7                            | Partial gastrectomy w/ anastomosis to jejunum                              |
| 44.5                            | Revision of gastric anastomosis                                            |
| 45.8                            | Total intra-abdominal colectomy                                            |
| 48.5                            | Abdominoperineal resection of rectum                                       |
| 50.0                            | Hepatotomy                                                                 |
| 50.3                            | Lobectomy of liver                                                         |
| 50.4                            | Total hepatectomy                                                          |
| 52.3                            | Marsupialization of pancreatic cyst                                        |
| 52.4                            | Internal drainage of pancreatic cyst                                       |
| 52.6                            | Total pancreatectomy                                                       |
| 52.7                            | Radical pancreaticoduodenectomy                                            |
| 53.7                            | Repair of diaphragmatic hernia, abdominal approach                         |
| 54.0                            | Incision of abdominal wall                                                 |
| 54.3                            | Excision or destruction of lesion or tissue of abdominal wall or umbilicus |
| 54.4                            | Excision or destruction of peritoneal tissue                               |
| 66.4                            | Total unilateral salpingectomy                                             |

|       |                                                                                                         |
|-------|---------------------------------------------------------------------------------------------------------|
| 68.0  | Other incision and excision of uterus                                                                   |
| 68.3  | Subtotal abdominal hysterectomy                                                                         |
| 68.4  | Total abdominal hysterectomy                                                                            |
| 68.6  | Radical abdominal hysterectomy                                                                          |
| 68.8  | Pelvic evisceration                                                                                     |
| 68.9  | Other and unspecified hysterectomy                                                                      |
| 69.3  | Paracervical uterine denervation                                                                        |
| 17.11 | Laparoscopic repair of direct inguinal hernia with graft or prosthesis                                  |
| 17.12 | Laparoscopic repair of indirect inguinal hernia with graft or prosthesis                                |
| 17.13 | Laparoscopic repair of inguinal hernia with graft or prosthesis, nos                                    |
| 17.21 | Laparoscopic bilateral repair of direct inguinal hernia with graft or prosthesis                        |
| 17.22 | Laparoscopic bilateral repair of indirect inguinal hernia with graft or prosthesis                      |
| 17.23 | Laparoscopic bilateral repair of inguinal hernia, one direct and one indirect, with graft or prosthesis |
| 17.24 | Laparoscopic bilateral repair of inguinal hernia with graft or prosthesis, nos                          |
| 41.33 | Open biopsy of spleen                                                                                   |
| 41.41 | Marsupialization of splenic cyst                                                                        |
| 41.42 | Excision of lesion or tissue of spleen                                                                  |
| 41.43 | Partial splenectomy                                                                                     |
| 41.93 | Excision of accessory spleen                                                                            |
| 41.94 | Transplantation of spleen                                                                               |
| 41.95 | Repair and plastic operations on spleen                                                                 |
| 41.99 | Other operations on spleen                                                                              |
| 42.40 | Esophagectomy, nos                                                                                      |
| 42.41 | Partial esophagectomy                                                                                   |
| 42.42 | Total esophagectomy                                                                                     |
| 42.53 | Intrathoracic esophageal anastomosis w/ interposition of small bowel                                    |
| 42.54 | Other intrathoracic esophagoenterostomy                                                                 |
| 42.55 | Intrathoracic esophageal anastomosis w/ interposition of colon                                          |
| 42.56 | Other intrathoracic esophagocolostomy                                                                   |
| 42.63 | Antesternal esophageal anastomosis w/ interposition of small bowel                                      |
| 42.64 | Other antesternal esophagoenterostomy                                                                   |
| 42.65 | Antesternal esophageal anastomosis w/ interposition of colon                                            |
| 42.66 | Other antesternal esophagocolostomy                                                                     |
| 42.91 | Ligation of esophageal varices                                                                          |
| 43.42 | Local excision of other lesion or tissue of stomach                                                     |
| 43.49 | Other destruction of lesion or tissue of stomach                                                        |
| 43.81 | Partial gastrectomy w/ jejuna transposition                                                             |
| 43.89 | Other partial gastrectomy                                                                               |
| 43.91 | Total gastrectomy w/ intestinal interposition                                                           |
| 43.99 | Other total gastrectomy                                                                                 |
| 44.00 | Vagotomy, nos                                                                                           |
| 44.01 | Truncal vagotomy (has one case)                                                                         |

|       |                                                                                |
|-------|--------------------------------------------------------------------------------|
| 44.02 | Highly selective vagotomy                                                      |
| 44.03 | Other selective vagotomy                                                       |
| 44.11 | Transabdominal gastroscopy                                                     |
| 44.15 | Open biopsy of stomach                                                         |
| 44.21 | Dilation of pylorus by incision                                                |
| 44.29 | Other pyloroplasty has 6 cases                                                 |
| 44.31 | High gastric bypass has 1 case                                                 |
| 44.38 | Laparoscopic gastroenterostomy                                                 |
| 44.39 | Other gastroenterostomy                                                        |
| 44.40 | Suture of peptic ulcer, nos                                                    |
| 44.41 | Suture of gastric ulcer site                                                   |
| 44.42 | Suture of duodenal ulcer site                                                  |
| 44.61 | Suture of laceration of stomach                                                |
| 44.63 | Closure of other gastric fistula                                               |
| 44.64 | Gastropexy                                                                     |
| 44.65 | Esophagogastroplasty                                                           |
| 44.66 | Other procedures for creation of esophagogastric sphincteric competence        |
| 44.67 | Laparoscopic procedures for creation of esophagogastric sphincteric competence |
| 44.68 | Laparoscopic gastroplasty                                                      |
| 44.69 | Other repair of stomach                                                        |
| 44.91 | Ligation of gastric varices                                                    |
| 44.92 | Intraoperative manipulation of stomach                                         |
| 44.95 | Laparoscopic gastric restrictive procedure                                     |
| 44.96 | Laparoscopic revision of gastric restrictive procedure                         |
| 44.97 | Laparoscopic revision of gastric restrictive devices                           |
| 44.99 | Gastric operation nec                                                          |
| 45.00 | Incision of intestine, nos                                                     |
| 45.01 | Incision of duodenum                                                           |
| 45.02 | Other incision of small intestine                                              |
| 45.03 | Incision of large intestine                                                    |
| 45.11 | Transabdominal endoscopy                                                       |
| 45.15 | Open biopsy of small intestine                                                 |
| 45.21 | Transabdominal endoscopy of large intestine                                    |
| 45.26 | Open biopsy of large intestine                                                 |
| 45.31 | Other local excision of lesion of duodenum                                     |
| 45.32 | Other destruction of lesion of duodenum                                        |
| 45.33 | Local excision of lesion or tissue of small intestine, except duodenum         |
| 45.34 | Other destruction of lesion of small intestine, except duodenum                |
| 45.41 | Excision of lesion or tissue of large intestine                                |
| 45.49 | Other destruction of lesion of large intestine                                 |
| 45.50 | Isolation of intestinal segment, nos                                           |
| 45.51 | Isolation of segment of small intestine                                        |

|       |                                                          |
|-------|----------------------------------------------------------|
| 45.52 | Isolation of segment of large intestine                  |
| 45.61 | Multiple segmental resection of small intestine          |
| 45.62 | Other partial resection of small intestine               |
| 45.63 | Total removal of small intestine                         |
| 45.90 | Intestinal anastomosis, nos                              |
| 45.91 | Small-to-small intestinal anastomosis                    |
| 45.92 | Anastomosis of small intestine to rectal stump           |
| 45.93 | Other small-to-large intestinal anastomosis              |
| 45.94 | Large-to-large intestinal anastomosis                    |
| 45.95 | Anastomosis to anus                                      |
| 46.01 | Exteriorization of small intestine                       |
| 46.03 | Exteriorization of large intestine                       |
| 46.10 | Colostomy, nos                                           |
| 46.11 | Temporary colostomy                                      |
| 46.13 | Permanent colostomy                                      |
| 46.14 | Delayed opening of colostomy                             |
| 46.20 | Ileostomy, nos                                           |
| 46.21 | Temporary ileostomy                                      |
| 46.22 | Continent ileostomy                                      |
| 46.23 | Other permanent ileostomy                                |
| 46.40 | Revision of intestinal stoma, nos                        |
| 46.41 | Revision of stoma of small intestine                     |
| 46.42 | Repair of pericostomy hernia                             |
| 46.43 | Other revision of stoma of large intestine               |
| 46.50 | Closure of intestinal stoma, not otherwise specified     |
| 46.51 | Closure of stoma of small intestine                      |
| 46.52 | Closure of stoma of large intestine                      |
| 46.60 | Fixation of intestine, nos                               |
| 46.61 | Fixation of small intestine to abdominal wall            |
| 46.62 | Other fixation of small intestine                        |
| 46.63 | Fixation of large intestine to abdominal wall            |
| 46.64 | Other fixation of large intestine                        |
| 46.72 | Closure of fistula of duodenum                           |
| 46.73 | Suture of laceration of small intestine, except duodenum |
| 46.74 | Closure of fistula of small intestine, except duodenum   |
| 46.75 | Suture of laceration of large intestine                  |
| 46.76 | Closure of fistula of large intestine                    |
| 46.79 | Other repair of intestine                                |
| 46.80 | Intra-abdominal manipulation of intestine, nos           |
| 46.81 | Intra-abdominal manipulation of small intestine          |
| 46.82 | Intra-abdominal manipulation of large intestine          |

|       |                                                   |
|-------|---------------------------------------------------|
| 46.91 | Myotomy of sigmoid colon                          |
| 46.92 | Myotomy of other parts of colon                   |
| 46.93 | Revision of anastomosis of small intestine        |
| 46.94 | Revision of anastomosis of large intestine        |
| 46.97 | Transplant of intestine                           |
| 46.99 | Other operations on intestines                    |
| 48.21 | Transabdominal proctosigmoidoscopy                |
| 48.25 | Open biopsy of rectum                             |
| 48.40 | Pull through resection of rectum, nos             |
| 48.41 | Submucosal resection of rectum                    |
| 48.42 | Lap pull-through resection of rectum              |
| 48.43 | Open pull-through resection of rectum             |
| 48.49 | Other pull-through resection of rectum            |
| 48.50 | Abdominoperineal resection of rectum              |
| 48.51 | Laparoscopic abdominoperineal resection of rectum |
| 48.52 | Open abdominoperineal resection of rectum         |
| 48.59 | Other abdominoperineal resection of rectum        |
| 48.71 | Suture of laceration of rectum                    |
| 48.74 | Rectorectostomy                                   |
| 48.75 | Abdominal proctopexy                              |
| 50.12 | Open biopsy of liver                              |
| 50.14 | Laparoscopic liver biopsy                         |
| 50.19 | Other diagnostic procedures on liver              |
| 50.21 | Marsupialization of lesion of liver               |
| 50.22 | Partial hepatectomy                               |
| 50.23 | Opn abltn liver les/tiss                          |
| 50.25 | Laparoscopic ablation of liver lesion or tissue   |
| 50.26 | Abltn liver les/tiss nec oct06-                   |
| 50.29 | Other destruction of lesion of liver              |
| 50.51 | Auxiliary liver transplant                        |
| 50.59 | Other transplant of liver                         |
| 50.61 | Closure of laceration of liver                    |
| 50.69 | Other repair of liver                             |
| 51.02 | Trocar cholecystostomy                            |
| 51.03 | Other cholecystostomy                             |
| 51.04 | Other cholecystotomy                              |
| 51.13 | Open biopsy of gallbladder or bile ducts          |
| 51.19 | Other diagnostic procedures on biliary tract      |
| 51.21 | Other partial cholecystectomy                     |
| 51.22 | Cholecystectomy                                   |
| 51.23 | Laparoscopic cholecystectomy                      |

|       |                                                                         |
|-------|-------------------------------------------------------------------------|
| 51.24 | Laparoscopic partial cholecystectomy                                    |
| 51.31 | Anastomosis of gallbladder to hepatic ducts                             |
| 51.32 | Anastomosis of gallbladder to intestine                                 |
| 51.33 | Anastomosis of gallbladder to pancreas                                  |
| 51.34 | Anastomosis of gallbladder to stomach                                   |
| 51.35 | Other gallbladder anastomosis                                           |
| 51.36 | Choledochoenterostomy                                                   |
| 51.37 | Anastomosis of hepatic duct to gastrointestinal tract                   |
| 51.39 | Other bile duct anastomosis                                             |
| 51.41 | Common duct exploration for removal of calculus                         |
| 51.42 | Common duct exploration for relief of other obstruction                 |
| 51.43 | Insertion of choledochohepatic tube for decompression                   |
| 51.49 | Incision of other bile ducts for relief of obstruction                  |
| 51.51 | Exploration of common duct                                              |
| 51.59 | Incision of other bile duct                                             |
| 51.61 | Excision of cystic duct remnant                                         |
| 51.62 | Excision of ampulla of vater (with reimplantation of common duct)       |
| 51.63 | Other excision of common duct                                           |
| 51.69 | Excision of other bile duct                                             |
| 51.71 | Simple suture of common bile duct                                       |
| 51.72 | Choledochoplasty                                                        |
| 51.79 | Repair of other bile ducts                                              |
| 51.81 | Dilation of sphincter of oddi                                           |
| 51.82 | Pancreatic sphincterotomy                                               |
| 51.83 | Pancreatic sphincteroplasty                                             |
| 51.89 | Other operations on sphincter of oddi                                   |
| 51.91 | Repair of laceration of gallbladder                                     |
| 51.92 | Closure of cholecystostomy                                              |
| 51.93 | Closure of other biliary fistula                                        |
| 51.94 | Revision of anastomosis of biliary tract                                |
| 51.95 | Removal of prosthetic device from bile duct                             |
| 51.99 | Other operations on biliary tract                                       |
| 52.01 | Drainage of pancreatic cyst by catheter                                 |
| 52.09 | Other pancreatectomy                                                    |
| 52.12 | Open biopsy of pancreas                                                 |
| 52.19 | Other diagnostic procedures on pancreas                                 |
| 52.22 | Other excision or destruct of lesion or tissue of pancreas or panc duct |
| 52.51 | Proximal pancreatectomy                                                 |
| 52.52 | Distal pancreatectomy                                                   |
| 52.53 | Radical subtotal pancreatectomy                                         |
| 52.59 | Other partial pancreatectomy                                            |



|       |                                                                                               |
|-------|-----------------------------------------------------------------------------------------------|
| 52.80 | Pancreatic transplant, nos                                                                    |
| 52.81 | Reimplantation                                                                                |
| 52.82 | Homotransplant of pancreas                                                                    |
| 52.83 | Heterotransplant of pancreas                                                                  |
| 52.92 | Cannulation of pancreatic duct                                                                |
| 52.95 | Other repair of pancreas                                                                      |
| 52.96 | Anastomosis of pancreas                                                                       |
| 52.99 | Other operations on pancreas                                                                  |
| 53.00 | Unilateral repair of inguinal hernia, nos                                                     |
| 53.01 | Repair of direct inguinal hernia                                                              |
| 53.02 | Repair of indirect inguinal hernia                                                            |
| 53.03 | Repair of direct inguinal hernia w/ graft or prosthesis                                       |
| 53.04 | Repair of indirect inguinal hernia w/ graft or prosthesis                                     |
| 53.05 | Repair of inguinal hernia w/ graft or prosthesis, nos                                         |
| 53.10 | Bilateral repair of inguinal hernia, nos                                                      |
| 53.11 | Bilateral repair of direct inguinal hernia                                                    |
| 53.12 | Bilateral repair of indirect inguinal hernia                                                  |
| 53.13 | Bilateral repair of inguinal hernia, one direct and one indirect                              |
| 53.14 | Bilateral repair of direct inguinal hernia w/ graft or prosthesis                             |
| 53.15 | Bilateral repair of indirect inguinal hernia w/ graft or prosthesis                           |
| 53.16 | Bilateral repair of inguin hernia, 1 direct 1 indirect, w/ graft or pros                      |
| 53.17 | Bilateral inguinal hernia repair w/ graft or prosthesis, nos                                  |
| 53.21 | Unilateral repair of femoral hernia                                                           |
| 53.29 | Other unilateral femoral herniorrhaphy                                                        |
| 53.31 | Bilateral repair of femoral hernia w/ graft or prosthesis                                     |
| 53.39 | Other bilateral femoral herniorrhaphy                                                         |
| 53.41 | Repair of umbilical hernia w/ prosthesis                                                      |
| 53.42 | Laparoscopic repair of umbilical hernia with graft or prosthesis                              |
| 53.43 | Other laparoscopic umbilical heriorrhaphy                                                     |
| 53.49 | Other umbilical herniorrhaphy                                                                 |
| 53.51 | Incisional hernia repair has 2 cases                                                          |
| 53.59 | Repair of other hernia of anterior abdominal wall                                             |
| 53.61 | Incisional hernia repair w/ prosthesis                                                        |
| 53.62 | Laparoscopic incisional hernia repair with graft or prosthesis                                |
| 53.63 | Other laparoscopic repair of other hernia of anterior abdominal wall with graft or prosthesis |
| 53.69 | Repair of other hernia of anterior abdominal wall w/ prosthesis                               |
| 53.71 | Lap repair of diaphragmatic hernia, abdominal approach                                        |
| 53.72 | Other and open repair of diaphragmatic hernia, abdominal approach                             |
| 53.75 | Repair of diaphragmatic hernia, abdominal approach, nos                                       |
| 54.11 | Exploratory laparotomy                                                                        |

|       |                                                           |
|-------|-----------------------------------------------------------|
| 54.12 | Reopening of recent laparotomy site                       |
| 54.19 | Other laparotomy                                          |
| 54.21 | Laparoscopy                                               |
| 54.22 | Biopsy of abdominal wall or umbilicus                     |
| 54.23 | Biopsy of abdominal wall or umbilicus                     |
| 54.29 | Other diagnostic procedures on abdominal region           |
| 54.51 | Laparoscopic lysis of peritoneal adhesions                |
| 54.59 | Other lysis of peritoneal adhesions                       |
| 54.61 | Reclosure of postoperative disruption of abdominal wall   |
| 54.62 | Delayed closure of granulating abdominal wound            |
| 54.63 | Other suture of abdominal wall                            |
| 54.64 | Suture of peritoneum                                      |
| 54.71 | Repair of gastroschisis                                   |
| 54.72 | Other repair of abdominal walls                           |
| 54.73 | Other repair of peritoneum                                |
| 54.74 | Other repair of omentum                                   |
| 54.75 | Other repair of mesentery                                 |
| 54.92 | Removal of foreign body from peritoneal cavity has 1 case |
| 54.93 | Creation of cutaneous peritoneal fistula                  |
| 54.94 | Creation of peritoneovascular shunt                       |
| 54.95 | Incision of peritoneum                                    |
| 56.51 | Formation of cutaneous ureteroileostomy                   |
| 56.52 | Revision of cutaneous ureteroileostomy                    |
| 56.61 | Formation of other cutaneous ureterostomy                 |
| 56.62 | Revision of other cutaneous ureterostomy                  |
| 56.71 | Urinary diversion to intestine                            |
| 56.72 | Revision of ureterointestinal anastomosis                 |
| 59.00 | Retroperitoneal dissection, nos                           |
| 65.01 | Laparoscopic oophorotomy                                  |
| 65.09 | Other oophorectomy                                        |
| 65.12 | Other biopsy of ovary                                     |
| 65.21 | Marsupialization of ovarian cyst                          |
| 65.22 | Wedge resection of ovary                                  |
| 65.23 | Laparoscopic marsupialization of ovarian cyst             |
| 65.24 | Laparoscopic wedge resection of ovary                     |
| 65.25 | Other laparoscopic local excision or destruction of ovary |
| 65.29 | Other local excision or destruction of ovary              |
| 65.31 | Laparoscopic unilateral oophorectomy                      |
| 65.39 | Other unilateral oophorectomy                             |
| 65.41 | Laparoscopic unilateral salpingoophorectomy               |
| 65.49 | Other unilateral salpingoophorectomy                      |

|       |                                                                          |
|-------|--------------------------------------------------------------------------|
| 65.51 | Other removal of both ovaries at same operative episode                  |
| 65.52 | Other removal of remaining ovary                                         |
| 65.53 | Laparoscopic removal of both ovaries at same operative episode           |
| 65.54 | Laparoscopic removal of remaining ovary                                  |
| 65.61 | Other removal of both ovaries and tubes at same operative episode        |
| 65.62 | Other removal of remaining ovary and tube                                |
| 65.63 | Laparoscopic removal of both ovaries and tubes at same operative episode |
| 65.64 | Laparoscopic removal of remaining                                        |
| 65.71 | Other simple suture of ovary                                             |
| 65.72 | Other reimplantation of ovary                                            |
| 65.73 | Other salpingo oophoroplasty                                             |
| 65.74 | Laparoscopic simple suture of ovary                                      |
| 65.75 | Laparoscopic reimplantation of ovary                                     |
| 65.76 | Laparoscopic salpingo-oophoroplasty                                      |
| 65.79 | Other repair of ovary                                                    |
| 65.81 | Laparoscopic lysis of adhesions of ovary and fallopian tube              |
| 65.89 | Other lysis of adhesions of ovary and fallopian tube                     |
| 65.92 | Transplantation of ovary                                                 |
| 65.93 | Manual rupture of ovarian cyst                                           |
| 65.94 | Ovarian denervation                                                      |
| 65.95 | Release of torsion of ovary                                              |
| 65.99 | Other operations on ovary                                                |
| 66.01 | Salpingotomy                                                             |
| 66.02 | Salpingostomy                                                            |
| 66.11 | Biopsy of fallopian tube                                                 |
| 66.19 | Other diagnostic procedures on fallopian tubes                           |
| 66.31 | Other bilateral ligation and crushing of fallopian tubes                 |
| 66.32 | Other bilateral ligation and division of fallopian tubes                 |
| 66.39 | Other bilateral destruction or occlusion of fallopian tubes              |
| 66.51 | Removal of both fallopian tubes at same operative episode                |
| 66.52 | Removal of remaining fallopian tube                                      |
| 66.61 | Excision or destruction of lesion of fallopian tube                      |
| 66.62 | Salpingectomy w/ removal of tubal pregnancy                              |
| 66.63 | Bilateral partial salpingectomy, nos                                     |
| 66.69 | Other partial salpingectomy                                              |
| 66.71 | Simple suture of fallopian tube                                          |
| 66.72 | Salpingo-oophorostomy                                                    |
| 66.73 | Salpingo-salpingostomy                                                   |
| 66.74 | Salpingo-uterostomy                                                      |
| 66.79 | Other repair of fallopian tube                                           |
| 66.92 | Unilateral destruction or occlusion of fallopian tube                    |

|       |                                                                   |
|-------|-------------------------------------------------------------------|
| 66.93 | Implantation or replacement of prosthesis of fallopian tube       |
| 66.94 | Removal of prosthesis of fallopian tube                           |
| 66.96 | Dilation of fallopian tube                                        |
| 66.97 | Burying of fimbriae in uterine wall                               |
| 66.99 | Other operation of fallopian tube                                 |
| 68.13 | Open biopsy of uterus                                             |
| 68.14 | Open biopsy of uterine ligaments                                  |
| 68.19 | Other diagnostic procedures on uterus and supporting structures   |
| 68.23 | Endometrial ablation                                              |
| 68.29 | Other excision or destruction of lesion of uterus                 |
| 68.31 | Laparoscopic supracervical hysterectomy [lsh]                     |
| 68.39 | Other subtotal abdominal hysterectomy                             |
| 68.41 | Lap total abdominal hyst oct06-                                   |
| 68.49 | Total abd hyst nec/nos oct06-                                     |
| 68.61 | Lap radical abdomnl hyst oct06-                                   |
| 68.69 | Radical abd hyst nec/nos oct06-                                   |
| 69.19 | Other excision or destruction of uterus and supporting structures |
| 69.21 | Interposition operation                                           |
| 69.22 | Other uterine suspension                                          |
| 69.23 | Vaginal repair of chronic inversion of uterus                     |
| 69.29 | Other repair of uterus and supporting structures                  |
| 69.41 | Suture of laceration of uterus                                    |
| 69.42 | Closure of fistula of uterus                                      |
| 69.49 | Other repair of uterus                                            |
| 69.98 | Other operations on supporting structures of uterus               |

**Supplemental Table 3:** Anticoagulation medications

|             |
|-------------|
| Heparin     |
| Warfarin    |
| Ardeparin   |
| Bemiparin   |
| Certoparin  |
| Enoxaparin  |
| Parnaparin  |
| Tinaziparin |
| Dalteparin  |
| Reviparin   |
| Nadroparin  |

**Supplemental Table 4:** Examples of text used to identify outpatient VTE events

| <b>Event</b> | <b>Context classification stage</b> | <b>Text</b>                                                                                                                  |
|--------------|-------------------------------------|------------------------------------------------------------------------------------------------------------------------------|
| DVT          | a                                   | In the course of this patient's treatment he has developed a left lower extremity DVT                                        |
| DVT          | a                                   | may have DVT, agree w/ recommendation to evaluate in the ER ASAP                                                             |
| DVT          | a, b                                | His RLE venous duplex is positive for DVT                                                                                    |
| DVT          | a, b                                | pt found to have proximal DVT                                                                                                |
| DVT          | a, b                                | Ultrasound positive for DVT, new clot eviden referred back to ER for care                                                    |
| DVT          | a                                   | On that admission he was diagnosed with bilateral calf DVTs and started on anticoagulation                                   |
| DVT          | a                                   | And dry with trace pedal edema and some swelling on the left side greater than the right due to his DVT which is on the left |
| PE           | a                                   | Your INR goal for PE is 2-3                                                                                                  |
| PE           | a                                   | Pulmonary embolism 4                                                                                                         |
| PE           | a, b                                | found to have bilateral massive PE and left DVT. no prior episodes of DVT/PE                                                 |
| PE           | a                                   | Indication for Anticoagulation Therapy: Pulmonary Embolism                                                                   |
| PE           | a, b                                | Patient has been found to have a small pe He has been started on anticoagulation                                             |
| PE           | a, b                                | Pt found to have bilateral PEs                                                                                               |
| PE           | a                                   | Problems-PEs, anticoagulated                                                                                                 |
| PE           | a, b                                | Diagnosis: PE                                                                                                                |

Note: Context classification stage a identified mentions of PE, DVT, and VTE with no specific language ruling out acute occurrence such as negation, historical aspect, or family history. Context classification stage b identified mentions of PE, DVT, and VTE with explicit language or additional rules that reflect expressions and templates commonly used by the VA clinicians to confirm an acute occurrence.
